# Supplementary material for: Quantum Chemical Investigation of Polychlorinated Dibenzodioxins, Dibenzofurans and Biphenyls
Source: Preprints.org preprint supplement (doi:10.20944/preprints202012.0007.v1), 2020-12-01
Supplement: Supplementary file 1 [file supplementary]

# Quantum chemical investigation of polychlorinated dibenzodioxins, dibenzofurans and biphenyls

Sopant Datta and Taweetham Limpanuparb\*

Mahidol University International College, Mahidol University, Salaya, Phutthamonthon, Nakhon Pathom 73170, Thailand

\*corresponding author's email: taweetham.lim@mahidol.edu

Supplementary Table S1 Summary of computational data and analyses on PCDDs, PCDFs and PCBs in the literature

| Compound                     |                                              | PCDD                                                                                                                                                                                                                                                                  | PCDF                                                                                                                                                                              | PCB                                                                                                                                                                                              |
|------------------------------|----------------------------------------------|-----------------------------------------------------------------------------------------------------------------------------------------------------------------------------------------------------------------------------------------------------------------------|-----------------------------------------------------------------------------------------------------------------------------------------------------------------------------------|--------------------------------------------------------------------------------------------------------------------------------------------------------------------------------------------------|
| Property                     |                                              |                                                                                                                                                                                                                                                                       |                                                                                                                                                                                   |                                                                                                                                                                                                  |
| Energetic/Thermodynamic data | For all compounds                            | Results based on B3LYP/6-31G(d,p)[1,2], B3LYP/6-31G(2df,p)[3], B3LYP/6-311G(d,p)[4], B3LYP/6-311G++(3df,3pd)[3], G3XMP2//B3LYP/6-31G(2df,p)[3]                                                                                                                        | Results based on B3LYP/6-31G(2df,p)[5], B3LYP/6-311G(d,p)[6], B3LYP/6-311+G(3df,p)//B3LYP/6-31G(d)[7], B3LYP/6-311++G(3df,3pd)[5], MP2/G3MP3Large, G3MP2, G3XMP2[5]               | Results based on B3LYP/6-31G(d)[8], B3LYP/6-31G(d,p)[9] (possible atropisomers not treated by QM methods)                                                                                        |
|                              | For selected compounds                       | Results based on B3LYP/6-311G(d,p)//B3LYP/6-31G(d,p)[1], B3LYP/cc-pVTZ//B3LYP/6-31G(d,p)[1], B3LYP/6-311+G(3df,2p)//B3LYP/6-31G(d)[10] B3LYP/6-311+G(3df,2p)//B3LYP/6-31G(d,p)[11], B3LYP, B3P86, B3W91 on aug'-cc-pVDZ basis[12]                                     | Results based on B3LYP/6-31G(d), B3LYP/6-311G(d,p), B3LYP/6-311+G(d,p) B3LYP/6-311+G(2d,2p)[13], B3LYP/6-311+G(3df,p)//B3LYP/6-31G(d)[14] (with additional prediction for others) | Results based on B3LYP/6-31G(d)[15], B3LYP/6-311G(d,p)[16], B3LYP/cc-pVTZ (for biphenyl only)[17]                                                                                                |
| Structural data              | For all compounds                            |                                                                                                                                                                                                                                                                       |                                                                                                                                                                                   | Results based on B3LYP/6-31G(d)[9]                                                                                                                                                               |
|                              | For selected compounds                       | Results based on B3LYP/6-31G(d)[10], B3W91/aug'-cc-pVDZ[12]                                                                                                                                                                                                           | Results based on B3LYP/6-311+G(2d,2p)[13]                                                                                                                                         | Results based on B3LYP/6-311+G(2d,2p)[18]                                                                                                                                                        |
| Others                       | Electron affinities                          | Results based on B3LYP/6-31G(d,p), B3LYP/aug-cc-pVDZ, B3LYP/aug-cc-pVTZ//B3LYP/6-31G(d,p)[19], HF, B3LYP, B3P86, B3PW91 on aug'-cc-pVDZ basis[12]                                                                                                                     | Results based on B3LYP/6-31G(d), B3LYP/6-311G(d,p), B3LYP/6-311+G(d,p), B3LYP/6-311+G(2d,2p)[13]                                                                                  | Results based on B3LYP/6-311G(d,p), B3LYP/6-311+G-(2d,2p)[18]                                                                                                                                    |
|                              | Orbitals/potentials                          | HOMO and LUMO energies, ionization potential, and natural bond orbital analysis based on B3LYP/6-31G(d)[10]                                                                                                                                                           |                                                                                                                                                                                   | Electrostatic potential based on B3LYP/6-31G(d) (possible atropisomers not treated by QM methods)[9]                                                                                             |
|                              | Reaction mechanisms                          | - Formation of PCDD/Fs from PCB oxidation based on M062X/6-311+G(d,p)[20]                                                                                                                                                                                             |                                                                                                                                                                                   |                                                                                                                                                                                                  |
|                              |                                              | - Destruction by singlet oxygen based on B3LYP/6-311+g(d,p)[21]                                                                                                                                                                                                       |                                                                                                                                                                                   |                                                                                                                                                                                                  |
|                              | Analysis of MWI isomer distribution patterns | - Dissociation based on DFT+vdW/SVP[22]<br>- Detection by metal-doped graphene based on PBE/DNP[23]                                                                                                                                                                   | - Reaction with hydrogen peroxide based on B3LYP/6-311++G(d,p)[24]                                                                                                                |                                                                                                                                                                                                  |
|                              |                                              | - Do not follow chlorination models.[25,26]<br>- <i>Meta</i> substituent pairs are influential, suggests chlorophenols as precursors.[27]                                                                                                                             | - Chlorination-based models[5,25,26] predict well, specifically, substitutions at positions 1 or 9 are highly influential.[27]                                                    | - Chlorination model predicts well,[25] substitution pattern parameters are more influential than physicochemical properties.[28]                                                                |
|                              | Analysis of toxicity                         | - PCDD/Fs are electron acceptors in charge transfer complexes with aryl hydrocarbon receptors, based on QSAR modeling.[10,29]<br>- For PCDDs, molecular dynamics simulation can predict interaction energy between TCDD and AhR and rank of TEF in avian species.[30] |                                                                                                                                                                                   | Toxicity is associated with<br>- high electrostatic potential[9]<br>- high chance to adopt coplanar conformation[9,18]<br>- high chemical potential (Gibbs energy of formation per Cl atom).[31] |

|  |                      |                                                                                                                             |                                                                                                                            |  |
|--|----------------------|-----------------------------------------------------------------------------------------------------------------------------|----------------------------------------------------------------------------------------------------------------------------|--|
|  |                      | Low polarity or hydrophobicity potentially leads to bioaccumulation.[9,32,33]                                               |                                                                                                                            |  |
|  | Method<br>assessment | Structural data obtained from B3PW91 calculations are closer to experimental values than those from B3LYP calculations.[12] | Compared to G3XMP2 and MP2, B3LYP energy calculations underbind the significance of substitutions at positions 1 and 4.[5] |  |
|  |                      | Compared to G3XMP2, B3LYP calculations overbind vicinal Cl-atoms repulsions.[3]                                             |                                                                                                                            |  |

Supplementary Table S2 List of all PCDDs by substitution positions and numbering, proposed by Ballschmiter *et al.*, [34] revised by Dorofeeva *et al.* [2] (For simplicity and completeness, number 0 of each class stands for non-substituted compound.)

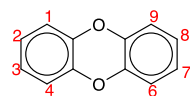

| No. | Compound | No. | Compound  | No. | Compound        |
|-----|----------|-----|-----------|-----|-----------------|
| 1   | 1        | 26  | 2,3,7     | 51  | 1,2,3,6,7       |
| 2   | 2        | 27  | 1,2,3,4   | 52  | 1,2,3,6,8       |
| 3   | 1,2      | 28  | 1,2,3,6   | 53  | 1,2,3,6,9       |
| 4   | 1,3      | 29  | 1,2,3,7   | 54  | 1,2,3,7,8       |
| 5   | 1,4      | 30  | 1,2,3,8   | 55  | 1,2,3,7,9       |
| 6   | 1,6      | 31  | 1,2,3,9   | 56  | 1,2,3,8,9       |
| 7   | 1,7      | 32  | 1,2,4,6   | 57  | 1,2,4,6,7       |
| 8   | 1,8      | 33  | 1,2,4,7   | 58  | 1,2,4,6,8       |
| 9   | 1,9      | 34  | 1,2,4,8   | 59  | 1,2,4,6,9       |
| 10  | 2,3      | 35  | 1,2,4,9   | 60  | 1,2,4,7,8       |
| 11  | 2,7      | 36  | 1,2,6,7   | 61  | 1,2,4,7,9       |
| 12  | 2,8      | 37  | 1,2,6,8   | 62  | 1,2,4,8,9       |
| 13  | 1,2,3    | 38  | 1,2,6,9   | 63  | 1,2,3,4,6,7     |
| 14  | 1,2,4    | 39  | 1,2,7,8   | 64  | 1,2,3,4,6,8     |
| 15  | 1,2,6    | 40  | 1,2,7,9   | 65  | 1,2,3,4,6,9     |
| 16  | 1,2,7    | 41  | 1,2,8,9   | 66  | 1,2,3,4,7,8     |
| 17  | 1,2,8    | 42  | 1,3,6,8   | 67  | 1,2,3,6,7,8     |
| 18  | 1,2,9    | 43  | 1,3,6,9   | 68  | 1,2,3,6,7,9     |
| 19  | 1,3,6    | 44  | 1,3,7,8   | 69  | 1,2,3,6,8,9     |
| 20  | 1,3,7    | 45  | 1,3,7,9   | 70  | 1,2,3,7,8,9     |
| 21  | 1,3,8    | 46  | 1,4,6,9   | 71  | 1,2,4,6,7,9     |
| 22  | 1,3,9    | 47  | 1,4,7,8   | 72  | 1,2,4,6,8,9     |
| 23  | 1,4,6    | 48  | 2,3,7,8   | 73  | 1,2,3,4,6,7,8   |
| 24  | 1,4,7    | 49  | 1,2,3,4,6 | 74  | 1,2,3,4,6,7,9   |
| 25  | 1,7,8    | 50  | 1,2,3,4,7 | 75  | 1,2,3,4,6,7,8,9 |

Supplementary Table S3 List of all PCDFs by substitution positions and numbering, proposed by Ballschmiter *et al.* [34] (For simplicity and completeness, number 0 of each class stands for non-substituted compound.)

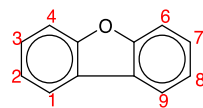

| No. | Compound | No. | Compound  | No. | Compound        |
|-----|----------|-----|-----------|-----|-----------------|
| 1   | 1        | 46  | 2,6,7     | 91  | 1,2,3,6,7       |
| 2   | 2        | 47  | 3,4,6     | 92  | 1,2,3,6,8       |
| 3   | 3        | 48  | 3,4,7     | 93  | 1,2,3,6,9       |
| 4   | 4        | 49  | 1,2,3,4   | 94  | 1,2,3,7,8       |
| 5   | 1,2      | 50  | 1,2,3,6   | 95  | 1,2,3,7,9       |
| 6   | 1,3      | 51  | 1,2,3,7   | 96  | 1,2,3,8,9       |
| 7   | 1,4      | 52  | 1,2,3,8   | 97  | 1,2,4,6,7       |
| 8   | 1,6      | 53  | 1,2,3,9   | 98  | 1,2,4,6,8       |
| 9   | 1,7      | 54  | 1,2,4,6   | 99  | 1,2,4,6,9       |
| 10  | 1,8      | 55  | 1,2,4,7   | 100 | 1,2,4,7,8       |
| 11  | 1,9      | 56  | 1,2,4,8   | 101 | 1,2,4,7,9       |
| 12  | 2,3      | 57  | 1,2,4,9   | 102 | 1,2,4,8,9       |
| 13  | 2,4      | 58  | 1,2,6,7   | 103 | 1,2,6,7,8       |
| 14  | 2,6      | 59  | 1,2,6,8   | 104 | 1,2,6,7,9       |
| 15  | 2,7      | 60  | 1,2,6,9   | 105 | 1,3,4,6,7       |
| 16  | 2,8      | 61  | 1,2,7,8   | 106 | 1,3,4,6,8       |
| 17  | 3,4      | 62  | 1,2,7,9   | 107 | 1,3,4,6,9       |
| 18  | 3,6      | 63  | 1,2,8,9   | 108 | 1,3,4,7,8       |
| 19  | 3,7      | 64  | 1,3,4,6   | 109 | 1,3,4,7,9       |
| 20  | 4,6      | 65  | 1,3,4,7   | 110 | 1,3,6,7,8       |
| 21  | 1,2,3    | 66  | 1,3,4,8   | 111 | 1,4,6,7,8       |
| 22  | 1,2,4    | 67  | 1,3,4,9   | 112 | 2,3,4,6,7       |
| 23  | 1,2,6    | 68  | 1,3,6,7   | 113 | 2,3,4,6,8       |
| 24  | 1,2,7    | 69  | 1,3,6,8   | 114 | 2,3,4,7,8       |
| 25  | 1,2,8    | 70  | 1,3,6,9   | 115 | 1,2,3,4,6,7     |
| 26  | 1,2,9    | 71  | 1,3,7,8   | 116 | 1,2,3,4,6,8     |
| 27  | 1,3,4    | 72  | 1,3,7,9   | 117 | 1,2,3,4,6,9     |
| 28  | 1,3,6    | 73  | 1,4,6,7   | 118 | 1,2,3,4,7,8     |
| 29  | 1,3,7    | 74  | 1,4,6,8   | 119 | 1,2,3,4,7,9     |
| 30  | 1,3,8    | 75  | 1,4,6,9   | 120 | 1,2,3,4,8,9     |
| 31  | 1,3,9    | 76  | 1,4,7,8   | 121 | 1,2,3,6,7,8     |
| 32  | 1,4,6    | 77  | 1,6,7,8   | 122 | 1,2,3,6,7,9     |
| 33  | 1,4,7    | 78  | 2,3,4,6   | 123 | 1,2,3,6,8,9     |
| 34  | 1,4,8    | 79  | 2,3,4,7   | 124 | 1,2,3,7,8,9     |
| 35  | 1,4,9    | 80  | 2,3,4,8   | 125 | 1,2,4,6,7,8     |
| 36  | 1,6,7    | 81  | 2,3,6,7   | 126 | 1,2,4,6,7,9     |
| 37  | 1,6,8    | 82  | 2,3,6,8   | 127 | 1,2,4,6,8,9     |
| 38  | 1,7,8    | 83  | 2,3,7,8   | 128 | 1,3,4,6,7,8     |
| 39  | 2,3,4    | 84  | 2,4,6,7   | 129 | 1,3,4,6,7,9     |
| 40  | 2,3,6    | 85  | 2,4,6,8   | 130 | 2,3,4,6,7,8     |
| 41  | 2,3,7    | 86  | 3,4,6,7   | 131 | 1,2,3,4,6,7,8   |
| 42  | 2,3,8    | 87  | 1,2,3,4,6 | 132 | 1,2,3,4,6,7,9   |
| 43  | 2,4,6    | 88  | 1,2,3,4,7 | 133 | 1,2,3,4,6,8,9   |
| 44  | 2,4,7    | 89  | 1,2,3,4,8 | 134 | 1,2,3,4,7,8,9   |
| 45  | 2,4,8    | 90  | 1,2,3,4,9 | 135 | 1,2,3,4,6,7,8,9 |

Supplementary Table S4 List of all PCBs by substitution positions and numbering, first proposed by Ballschmiter *et al.*[35], later revised by IUPAC.[36] (For simplicity and completeness, number 0 of each class stands for non-substituted compound.)

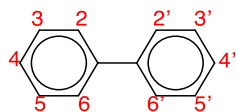

| No. | Compound  | No. | Compound    | No. | Compound     | No. | Compound       | No. | Compound                 |
|-----|-----------|-----|-------------|-----|--------------|-----|----------------|-----|--------------------------|
| 1   | 2         | 43  | 2,2',3,5    | 85  | 2,2',3,4,4'  | 127 | 3,3',4,5,5'    | 169 | 3,3',4,4',5,5'           |
| 2   | 3         | 44  | 2,2',3,5'   | 86  | 2,2',3,4,5   | 128 | 2,2',3,3',4,4' | 170 | 2,2',3,3',4,4',5         |
| 3   | 4         | 45  | 2,2',3,6    | 87  | 2,2',3,4,5'  | 129 | 2,2',3,3',4,5  | 171 | 2,2',3,3',4,4',6         |
| 4   | 2,2'      | 46  | 2,2',3,6'   | 88  | 2,2',3,4,6   | 130 | 2,2',3,3',4,5' | 172 | 2,2',3,3',4,5,5'         |
| 5   | 2,3       | 47  | 2,2',4,4'   | 89  | 2,2',3,4,6'  | 131 | 2,2',3,3',4,6  | 173 | 2,2',3,3',4,5,6          |
| 6   | 2,3'      | 48  | 2,2',4,5    | 90  | 2,2',3,4,5   | 132 | 2,2',3,3',4,6' | 174 | 2,2',3,3',4,5,6'         |
| 7   | 2,4       | 49  | 2,2',4,5'   | 91  | 2,2',3,4,6   | 133 | 2,2',3,3',5,5' | 175 | 2,2',3,3',4,5',6         |
| 8   | 2,4'      | 50  | 2,2',4,6    | 92  | 2,2',3,5,5'  | 134 | 2,2',3,3',5,6  | 176 | 2,2',3,3',4,6,6'         |
| 9   | 2,5       | 51  | 2,2',4,6'   | 93  | 2,2',3,5,6   | 135 | 2,2',3,3',5,6' | 177 | 2,2',3,3',4,5',6'        |
| 10  | 2,6       | 52  | 2,2',5,5'   | 94  | 2,2',3,5,6'  | 136 | 2,2',3,3',6,6' | 178 | 2,2',3,3',5,5',6         |
| 11  | 3,3'      | 53  | 2,2',5,6'   | 95  | 2,2',3,5',6  | 137 | 2,2',3,4,4',5  | 179 | 2,2',3,3',5,6,6'         |
| 12  | 3,4       | 54  | 2,2',6,6'   | 96  | 2,2',3,6,6'  | 138 | 2,2',3,4,4',5' | 180 | 2,2',3,4,4',5,5'         |
| 13  | 3,4'      | 55  | 2,3,3',4    | 97  | 2,2',3,4',5' | 139 | 2,2',3,4,4',6  | 181 | 2,2',3,4,4',5,6          |
| 14  | 3,5       | 56  | 2,3,3',4'   | 98  | 2,2',3,4',6' | 140 | 2,2',3,4,4',6' | 182 | 2,2',3,4,4',5,6'         |
| 15  | 4,4'      | 57  | 2,3,3',5    | 99  | 2,2',4,4',5  | 141 | 2,2',3,4,5,5'  | 183 | 2,2',3,4,4',5',6         |
| 16  | 2,2',3    | 58  | 2,3,3',5'   | 100 | 2,2',4,4',6  | 142 | 2,2',3,4,5,6   | 184 | 2,2',3,4,4',6,6'         |
| 17  | 2,2',4    | 59  | 2,3,3',6    | 101 | 2,2',4,5,5'  | 143 | 2,2',3,4,5,6'  | 185 | 2,2',3,4,5,5',6          |
| 18  | 2,2',5    | 60  | 2,3,4,4'    | 102 | 2,2',4,5,6'  | 144 | 2,2',3,4,5',6  | 186 | 2,2',3,4,5,6,6'          |
| 19  | 2,2',6    | 61  | 2,3,4,5     | 103 | 2,2',4,5',6  | 145 | 2,2',3,4,6,6'  | 187 | 2,2',3,4',5,5',6         |
| 20  | 2,3,3'    | 62  | 2,3,4,6     | 104 | 2,2',4,6,6'  | 146 | 2,2',3,4',5,5' | 188 | 2,2',3,4',5,6,6'         |
| 21  | 2,3,4     | 63  | 2,3,4',5    | 105 | 2,3,3',4,4'  | 147 | 2,2',3,4',5,6  | 189 | 2,3,3',4,4',5,5'         |
| 22  | 2,3,4'    | 64  | 2,3,4',6    | 106 | 2,3,3',4,5   | 148 | 2,2',3,4',5,6' | 190 | 2,3,3',4,4',5,6          |
| 23  | 2,3,5     | 65  | 2,3,5,6     | 107 | 2,3,3',4,5'  | 149 | 2,2',3,4',5',6 | 191 | 2,3,3',4,4',5',6         |
| 24  | 2,3,6     | 66  | 2,3',4,4'   | 108 | 2,3,3',4,6   | 150 | 2,2',3,4',6,6' | 192 | 2,3,3',4,5,5',6          |
| 25  | 2,3',4    | 67  | 2,3',4,5    | 109 | 2,3,3',4',5  | 151 | 2,2',3,5,5',6  | 193 | 2,3,3',4',5,5',6         |
| 26  | 2,3',5    | 68  | 2,3',4,5'   | 110 | 2,3,3',4',6  | 152 | 2,2',3,5,6,6'  | 194 | 2,2',3,3',4,4',5,5'      |
| 27  | 2,3',6    | 69  | 2,3',4,6    | 111 | 2,3,3',5,5'  | 153 | 2,2',4,4',5,5' | 195 | 2,2',3,3',4,4',5,6       |
| 28  | 2,4,4'    | 70  | 2,3',4',5   | 112 | 2,3,3',5,6   | 154 | 2,2',4,4',5,6' | 196 | 2,2',3,3',4,4',5,6'      |
| 29  | 2,4,5     | 71  | 2,3',4',6   | 113 | 2,3,3',5',6  | 155 | 2,2',4,4',6,6' | 197 | 2,2',3,3',4,4',6,6'      |
| 30  | 2,4,6     | 72  | 2,3',5,5'   | 114 | 2,3,4,4',5   | 156 | 2,3,3',4,4',5  | 198 | 2,2',3,3',4,5,5',6       |
| 31  | 2,4',5    | 73  | 2,3',5',6   | 115 | 2,3,4,4',6   | 157 | 2,3,3',4,4',5' | 199 | 2,2',3,3',4,5,5',6'      |
| 32  | 2,4',6    | 74  | 2,4,4',5    | 116 | 2,3,4,5,6    | 158 | 2,3,3',4,4',6  | 200 | 2,2',3,3',4,5,6,6'       |
| 33  | 2,3',4'   | 75  | 2,4,4',6    | 117 | 2,3,4',5,6   | 159 | 2,3,3',4,5,5'  | 201 | 2,2',3,3',4,5',6,6'      |
| 34  | 2,3',5'   | 76  | 2,3',4',5'  | 118 | 2,3',4,4',5  | 160 | 2,3,3',4,5,6   | 202 | 2,2',3,3',5,5',6,6'      |
| 35  | 3,3',4    | 77  | 3,3',4,4'   | 119 | 2,3',4,4',6  | 161 | 2,3,3',4,5',6  | 203 | 2,2',3,4,4',5,5',6       |
| 36  | 3,3',5    | 78  | 3,3',4,5    | 120 | 2,3',4,5,5'  | 162 | 2,3,3',4',5,5' | 204 | 2,2',3,4,4',5,6,6'       |
| 37  | 3,4,4'    | 79  | 3,3',4,5'   | 121 | 2,3',4,5',6  | 163 | 2,3,3',4',5,6  | 205 | 2,3,3',4,4',5,5',6       |
| 38  | 3,4,5     | 80  | 3,3',5,5'   | 122 | 2,3,3',4',5' | 164 | 2,3,3',4',5',6 | 206 | 2,2',3,3',4,4',5,5',6    |
| 39  | 3,4',5    | 81  | 3,4,4',5    | 123 | 2,3',4,4',5' | 165 | 2,3,3',5,5',6  | 207 | 2,2',3,3',4,4',5,6,6'    |
| 40  | 2,2',3,3' | 82  | 2,2',3,3',4 | 124 | 2,3',4',5,5' | 166 | 2,3,4,4',5,6   | 208 | 2,2',3,3',4,5,5',6,6'    |
| 41  | 2,2',3,4  | 83  | 2,2',3,3',5 | 125 | 2,3',4',5',6 | 167 | 2,3',4,4',5,5' | 209 | 2,2',3,3',4,4',5,5',6,6' |
| 42  | 2,2',3,4' | 84  | 2,2',3,3',6 | 126 | 3,3',4,4',5  | 168 | 2,3',4,4',5',6 |     |                          |

Supplementary Table S5 List of congener groups of PCDDs, PCDFs and PCBs by degree of substitution. The number of toxic congeners (See Table S10.) is given in red in a pair of parentheses. The number of congeners is doubled when moved from PCDDs to PCDFs for odd degree of substitution.

| Degree of chlorination | PCDDs  | PCDFs    | PCBs     |
|------------------------|--------|----------|----------|
| 0                      | 1      | 1        | 1        |
| 1                      | 2      | 4        | 3        |
| 2                      | 10     | 16       | 12       |
| 3                      | 14     | 28       | 24       |
| 4                      | 22 (1) | 38 (1)   | 42 (2)   |
| 5                      | 14 (1) | 28 (2)   | 46 (5)   |
| 6                      | 10 (3) | 16 (4)   | 42 (4)   |
| 7                      | 2 (1)  | 4 (2)    | 24 (1)   |
| 8                      | 1 (1)  | 1 (1)    | 12       |
| 9                      | N/A    | N/A      | 3        |
| 10                     | N/A    | N/A      | 1        |
| Total                  | 76 (7) | 136 (10) | 210 (12) |

Supplementary Table S6 Values for constant  $C_0$  and coefficients  $C_1, C_2, C_3, \dots$ , parameters  $x_1, x_2, x_3, \dots$  and correlation coefficients for energy prediction model  $E = C_0 + C_1x_1 + C_2x_2 + C_3x_3 + \dots$ , where  $E$  is the predicted  $\Delta G$  at 300K in Hartree from HF, B3LYP and electronic energy in Hartree from MP2. Pearson's correlation coefficient ( $R$ ) = 1.000 for all models.

|      |        | HF                    |                  | B3LYP                  |                  | MP2                    |                  |
|------|--------|-----------------------|------------------|------------------------|------------------|------------------------|------------------|
| PCDD | $i$    | $C_i$                 | $x_i$            | $C_i$                  | $x_i$            | $C_i$                  | $x_i$            |
|      | 0      | -4280.30              |                  | -4289.65               |                  | -4284.25               |                  |
|      | 1      | 458.92                | total H          | 459.62                 | total H          | 459.12                 | total H          |
|      | 2      | $3.44 \times 10^{-3}$ | <i>o</i> - total | $3.41 \times 10^{-3}$  | <i>o</i> - total | $1.89 \times 10^{-3}$  | <i>o</i> - total |
|      | 3      | $2.45 \times 10^{-3}$ | <i>o</i> - Cl-Cl | $1.33 \times 10^{-3}$  | <i>o</i> - Cl-Cl | $9.37 \times 10^{-4}$  | <i>o</i> - Cl-Cl |
|      | 4      | $1.33 \times 10^{-3}$ | <i>m</i> - Cl-Cl | $1.07 \times 10^{-3}$  | <i>m</i> - Cl-Cl | $5.50 \times 10^{-4}$  | <i>p</i> - Cl-Cl |
|      | 5      | $8.48 \times 10^{-4}$ | <i>p</i> - Cl-Cl |                        |                  | $7.01 \times 10^{-4}$  | <i>m</i> - Cl-Cl |
|      | $\rho$ | 0.9998                |                  | 0.9995                 |                  | 0.9997                 |                  |
| PCDF | $i$    | $C_i$                 | $x_i$            | $C_i$                  | $x_i$            | $C_i$                  | $x_i$            |
|      | 0      | -4205.40              |                  | -4214.39               |                  | -4209.16               |                  |
|      | 1      | 458.93                | total H          | 459.63                 | total H          | 459.12                 | total H          |
|      | 2      | $1.30 \times 10^{-2}$ | CR - C           | $1.11 \times 10^{-2}$  | CR - C           | $1.19 \times 10^{-2}$  | CR - C           |
|      | 3      | $6.28 \times 10^{-3}$ | <i>o</i> - Cl-Cl | $1.01 \times 10^{-4}$  | <i>o</i> - total | $3.14 \times 10^{-3}$  | <i>o</i> - Cl-Cl |
|      | 4      | $2.39 \times 10^{-3}$ | <i>o</i> - Cl-O  | $5.25 \times 10^{-3}$  | <i>o</i> - Cl-Cl | $1.15 \times 10^{-3}$  | <i>o</i> - Cl-O  |
|      | 5      | $1.23 \times 10^{-3}$ | <i>m</i> - Cl-Cl | $2.14 \times 10^{-3}$  | <i>o</i> - Cl-O  | $-1.65 \times 10^{-3}$ | <i>o</i> - Cl-C  |
|      | 6      | $8.40 \times 10^{-4}$ | <i>p</i> - Cl-C  | $9.90 \times 10^{-4}$  | <i>m</i> - Cl-Cl | $-8.46 \times 10^{-4}$ | <i>m</i> - Cl-O  |
|      | 7      |                       |                  | $-8.96 \times 10^{-4}$ | <i>m</i> - Cl-O  | $6.51 \times 10^{-4}$  | <i>m</i> - Cl-Cl |
|      | 8      |                       |                  | $1.09 \times 10^{-3}$  | <i>p</i> - Cl-Cl | $6.36 \times 10^{-4}$  | <i>p</i> - Cl-Cl |
|      | $\rho$ | 0.9997                |                  | 0.9997                 |                  | 0.9997                 |                  |
| PCB  | $i$    | $C_i$                 | $x_i$            | $C_i$                  | $x_i$            | $C_i$                  | $x_i$            |
|      | 0      | -5049.56              |                  | -5059.63               |                  | -5053.47               |                  |
|      | 1      | 458.94                | total H          | 459.64                 | total H          | 459.12                 | total H          |
|      | 2      | $4.36 \times 10^{-3}$ | <i>o</i> - total | $4.06 \times 10^{-3}$  | <i>o</i> - total | $3.11 \times 10^{-3}$  | <i>o</i> - Cl-Cl |
|      | 3      | $2.10 \times 10^{-3}$ | <i>o</i> - Cl-Cl | $1.21 \times 10^{-3}$  | <i>o</i> - Cl-Cl | $4.18 \times 10^{-4}$  | <i>m</i> - total |
|      | 4      | $1.45 \times 10^{-3}$ | <i>m</i> - total | $1.11 \times 10^{-3}$  | <i>m</i> - total | $5.05 \times 10^{-4}$  | <i>p</i> - total |
|      | 5      | $1.06 \times 10^{-3}$ | <i>p</i> - total | $-6.19 \times 10^{-4}$ | CR - C           |                        |                  |
|      | 6      |                       |                  | $8.06 \times 10^{-4}$  | <i>p</i> - total |                        |                  |
|      | $\rho$ | 0.9998                |                  | 0.9995                 |                  | 0.9977                 |                  |

Supplementary Table S7 Summary of experimental data on abundance of PCDDs, PCDFs and PCBs in the literature

| Compound       |                    | PCDD and PCDF                                                                                                                                                                                                                                   |  | PCB                                                                         |  |
|----------------|--------------------|-------------------------------------------------------------------------------------------------------------------------------------------------------------------------------------------------------------------------------------------------|--|-----------------------------------------------------------------------------|--|
| Classification |                    | PCDD and PCDF                                                                                                                                                                                                                                   |  | PCB                                                                         |  |
| Source         | Incineration       | Incineration plant emissions (Germany[34,37,38], Japan[39], Sweden[27])<br>Iron ore sinter plant (UK) and sinter plot (Swinden laboratories, Moorgate, Rotherham, UK)[40]<br>Pine wood combustion (USA)[41]<br>Automobile exhaust (Germany)[34] |  | Flue gas (Japan[42,43], Sweden[28])                                         |  |
|                | Commercial product | Aroclor (USA)[36]<br>Phenoclor (France)[36]<br>Clophen (Germany)[36]                                                                                                                                                                            |  | Aroclor (USA)[35,36,44-46]<br>Clophen (Germany)[35]<br>Kaneclor (Japan)[43] |  |
| Accumulation   | Environmental      | Urban dust (Washington D.C., USA)[34]<br>Sediment (Baltic sea)[47]<br>Water, soil, sediment (Japan)[39]<br>Air, water, soil, sediment*[48]                                                                                                      |  | Air, water, soil, sediment*[48]                                             |  |
|                |                    | Residential dust (Australia)[49]                                                                                                                                                                                                                |  |                                                                             |  |
|                | Biotic and food    | Human tissue (New York, USA[34],*[48])<br>Herring (Baltic sea)[34]                                                                                                                                                                              |  | Human milk*[46]<br>Food and animal feed*[48]                                |  |
|                |                    | Zucchini (Chile)[50]<br>Pine needles (Tokyo bay)[51]<br>Human milk (Guangdong, China)[52]                                                                                                                                                       |  |                                                                             |  |

\*Review from multiple locations

Supplementary Table S8 Rank correlation coefficients ( $\rho$  values) for association between predicted distribution (using Boltzmann distribution) of PCDDs and PCDFs based on relative stability and observed distribution from MWI fly ash samples.[39] Values used for relative stability are HF, B3LYP  $\Delta G$  at 600K and MP2 electronic energy. As abundance values were derived from GC/MS chromatograms, values from co-eluting peaks were discarded from calculations.

| Congener group                         |                                                                                              | Number of data points | Sample <sup>a</sup> | HF      | B3LYP   | MP2     |
|----------------------------------------|----------------------------------------------------------------------------------------------|-----------------------|---------------------|---------|---------|---------|
| PCDDs                                  | Tetrachlorodibenzodioxin<br>(C <sub>12</sub> H <sub>4</sub> O <sub>2</sub> Cl <sub>4</sub> ) | 10                    | 4                   | 0.7048  | 0.6585  | 0.6810  |
|                                        |                                                                                              |                       | 5                   | 0.4956  | 0.4499  | 0.5077  |
|                                        |                                                                                              |                       | 6                   | 0.9428  | 0.8550  | 0.8882  |
|                                        |                                                                                              |                       | 7                   | 0.4576  | 0.3547  | 0.3969  |
|                                        | Pentachlorodibenzodioxin<br>(C <sub>12</sub> H <sub>3</sub> O <sub>2</sub> Cl <sub>5</sub> ) | 10                    | 4                   | 0.6414  | 0.5988  | 0.6563  |
|                                        |                                                                                              |                       | 5                   | 0.5833  | 0.6341  | 0.6667  |
|                                        |                                                                                              |                       | 6                   | N/A     | N/A     | N/A     |
|                                        |                                                                                              |                       | 7                   | 0.7871  | 0.6031  | 0.7550  |
|                                        | Hexachlorodibenzodioxin<br>(C <sub>12</sub> H <sub>2</sub> O <sub>2</sub> Cl <sub>6</sub> )  | 5                     | 4                   | 0.4104  | 0.5526  | 0.6316  |
|                                        |                                                                                              |                       | 5                   | 0.5000  | 0.6156  | 0.6669  |
|                                        |                                                                                              |                       | 6                   | 0.8000  | 0.8721  | 0.8721  |
|                                        |                                                                                              |                       | 7                   | 0.5000  | 0.6156  | 0.6669  |
|                                        | Heptachlorodibenzodioxin<br>(C <sub>12</sub> HO <sub>2</sub> Cl <sub>7</sub> )               | 2                     | 4                   | -1.0000 | -1.0000 | -1.0000 |
|                                        |                                                                                              |                       | 5                   | -1.0000 | -1.0000 | -1.0000 |
|                                        |                                                                                              |                       | 6                   | -1.0000 | -1.0000 | -1.0000 |
| 7                                      |                                                                                              |                       | -1.0000             | -1.0000 | -1.0000 |         |
| Median for each method ( <i>n</i> =15) |                                                                                              |                       | All                 | 0.5000  | 0.5988  | 0.6563  |
| PCDFs                                  | Tetrachlorodibenzofuran<br>(C <sub>12</sub> H <sub>4</sub> OCl <sub>4</sub> )                | 6                     | 4                   | -0.3714 | -0.3714 | -0.3143 |
|                                        |                                                                                              |                       | 5                   | -0.6571 | -0.6571 | -0.6000 |
|                                        |                                                                                              |                       | 6                   | 0.3714  | 0.3714  | 0.4286  |
|                                        |                                                                                              |                       | 7                   | 0.0857  | 0.0857  | 0.1429  |
|                                        | Pentachlorodibenzofuran<br>(C <sub>12</sub> H <sub>3</sub> OCl <sub>5</sub> )                | 8                     | 4                   | 0.0120  | 0.0120  | 0.2515  |
|                                        |                                                                                              |                       | 5                   | -0.0238 | -0.0238 | 0.1905  |
|                                        |                                                                                              |                       | 6                   | 0.7306  | 0.7306  | 0.7545  |
|                                        |                                                                                              |                       | 7                   | 0.0238  | 0.0238  | 0.2619  |
|                                        | Hexachlorodibenzofuran<br>(C <sub>12</sub> H <sub>2</sub> OCl <sub>6</sub> )                 | 10                    | 4                   | 0.7697  | 0.7091  | 0.8061  |
|                                        |                                                                                              |                       | 5                   | 0.7295  | 0.6383  | 0.7599  |
|                                        |                                                                                              |                       | 6                   | 0.8632  | 0.7781  | 0.8268  |
|                                        |                                                                                              |                       | 7                   | 0.7939  | 0.6727  | 0.7697  |
|                                        | Heptachlorodibenzofuran<br>(C <sub>12</sub> HOCl <sub>7</sub> )                              | 4                     | 4                   | 0.8000  | 0.8000  | 0.8000  |
|                                        |                                                                                              |                       | 5                   | 0.8000  | 0.8000  | 0.8000  |
|                                        |                                                                                              |                       | 6                   | 1.0000  | 0.4000  | 1.0000  |
|                                        |                                                                                              |                       | 7                   | 1.0000  | 0.4000  | 1.0000  |
| Median for each method ( <i>n</i> =16) |                                                                                              |                       | All                 | 0.7300  | 0.4000  | 0.7572  |

<sup>a</sup>See sample descriptions in the reference

For PCBs, data were compared to observed distribution from 6 combustion experiments.[28]  $\rho$  values are provided in an excel file (PCB/PCB\_isomerdist\_correlation.xlsx).

Supplementary Table S9 Values for constant  $C_0$ , coefficients  $C_1$ ,  $C_2$  and correlation coefficients for the PCDF coplanarity prediction model:  $A = C_0 + (x_1x_9)C_1 + (x_2x_8)C_2$ , where  $A$  is the predicted angle value (see manuscript for further description) and  $x_i$  is 1 if compound is chlorinated at the position  $i$  and 0 if otherwise. Predictors are all statistically significant ( $p < .05$ ). Models based on HF calculations are not given as according to HF results, only two PCDFs are nonplanar.

|       | Angle group | Coefficients |        |        | $R$    | $\rho$ |
|-------|-------------|--------------|--------|--------|--------|--------|
|       |             | $C_0$        | $C_1$  | $C_2$  |        |        |
| B3LYP | 1           | -0.0649      | 0.3029 | 0.2595 | 0.6446 | 0.4481 |
|       | 2           | -0.3591      | 1.6806 | 1.4366 | 0.6457 | 0.4481 |
| MP2   | 1           | -0.0440      | 0.1808 | 0.1760 | 0.6100 | 0.5385 |
|       | 2           | -0.2317      | 0.9508 | 0.9267 | 0.6117 | 0.5385 |



Supplementary Table S10 List of toxic equivalency factor (TEF) values of 7 PCDDs, 10 PCDFs and 12 PCBs adapted from Van den Berg *et al.*[53]

|                     | Compound No. | (Substitution positions) | WHO 1998 TEF | WHO 2005 TEF |
|---------------------|--------------|--------------------------|--------------|--------------|
| PCDDs<br>(Table S2) | 48           | (2,3,7,8)                | 1            | 1            |
|                     | 54           | (1,2,3,7,8)              | 1            | 1            |
|                     | 66           | (1,2,3,4,7,8)            | 0.1          | 0.1          |
|                     | 67           | (1,2,3,6,7,8)            | 0.1          | 0.1          |
|                     | 70           | (1,2,3,7,8,9)            | 0.1          | 0.1          |
|                     | 73           | (1,2,3,4,6,7,8)          | 0.01         | 0.01         |
|                     | 75           | (1,2,3,4,6,7,8,9)        | 0.0001       | 0.0003       |
| PCDFs<br>(Table S3) | 83           | (2,3,7,8)                | 0.1          | 0.1          |
|                     | 94           | (1,2,3,7,8)              | 0.05         | 0.03         |
|                     | 114          | (2,3,4,7,8)              | 0.5          | 0.3          |
|                     | 118          | (1,2,3,4,7,8)            | 0.1          | 0.1          |
|                     | 121          | (1,2,3,6,7,8)            | 0.1          | 0.1          |
|                     | 124          | (1,2,3,7,8,9)            | 0.1          | 0.1          |
|                     | 130          | (2,3,4,6,7,8)            | 0.1          | 0.1          |
|                     | 131          | (1,2,3,4,6,7,8)          | 0.01         | 0.01         |
|                     | 134          | (1,2,3,4,7,8,9)          | 0.01         | 0.01         |
|                     | 135          | (1,2,3,4,6,7,8,9)        | 0.0001       | 0.0003       |
| PCBs<br>(Table S4)  | 77           | (3,3',4,4')              | 0.0001       | 0.0001       |
|                     | 81           | (3,4,4',5)               | 0.0001       | 0.0003       |
|                     | 105          | (2,3,3',4,4')            | 0.0001       | 0.00003      |
|                     | 114          | (2,3,4,4',5)             | 0.0005       | 0.00003      |
|                     | 118          | (2,3',4,4',5)            | 0.0001       | 0.00003      |
|                     | 123          | (2,3',4,4',5')           | 0.0001       | 0.00003      |
|                     | 126          | (3,3',4,4',5)            | 0.1          | 0.1          |
|                     | 156          | (2,3,3',4,4',5)          | 0.0005       | 0.00003      |
|                     | 157          | (2,3,3',4,4',5')         | 0.0005       | 0.00003      |
|                     | 167          | (2,3',4,4',5,5')         | 0.00001      | 0.00003      |
|                     | 169          | (3,3',4,4',5,5')         | 0.01         | 0.03         |
|                     | 189          | (2,3,3',4,4',5,5')       | 0.0001       | 0.00003      |

## References

- Lee, J.E.; Choi, W.; Min, B.J. DFT Calculation on the Thermodynamic Properties of Polychlorinated Dibenzo-p-dioxins: Intramolecular Cl-Cl Repulsion Effects and Their Thermochemical Implications. *The Journal of Physical Chemistry A* **2003**, *107*, 2693-2699, doi:10.1021/jp027133m.
- Dorofeeva, O.V.; Yungman, V.S. Enthalpies of Formation of Dibenzo-p-dioxin and Polychlorinated Dibenzo-p-dioxins Calculated by Density Functional Theory. *The Journal of Physical Chemistry A* **2003**, *107*, 2848-2854, doi:10.1021/jp026973y.
- Wang, L.; Heard, D.E.; Pilling, M.J.; Seakins, P. A Gaussian-3X Prediction on the Enthalpies of Formation of Chlorinated Phenols and Dibenzo-p-dioxins. *The Journal of Physical Chemistry A* **2008**, *112*, 1832-1840, doi:10.1021/jp077478a.
- Wang, Z.-Y.; Zhai, Z.-C.; Wang, L.-S.; Chen, J.-L.; Kikuchi, O.; Watanabe, T. Prediction of gas phase thermodynamic function of polychlorinated dibenzo-p-dioxins using DFT. *Journal of Molecular Structure: THEOCHEM* **2004**, *672*, 97-104, doi:10.1016/j.theochem.2003.11.030.
- Wang, L.; He, Y.-L. The Enthalpies of Formation for Polychlorinated Dibenzofurans with Use of G3XMP2 Model Chemistry and Density Functional Theory. *The Journal of Physical Chemistry A* **2009**, *113*, 238-245, doi:10.1021/jp802091z.
- Wang, Z.-Y.; Zhai, Z.-C.; Wang, L.-S. Prediction of gas phase thermodynamic properties of polychlorinated dibenzo-furans by DFT. *Journal of Molecular Structure: THEOCHEM* **2005**, *725*, 55-62, doi:10.1016/j.theochem.2005.01.037.
- Ewan, B.C.R.; Thompson, D. Predicted specific heat behaviour of the polychlorinated dibenzofuran family from DFT analysis. *Thermochimica Acta* **2013**, *558*, 46-52, doi:10.1016/j.tca.2013.02.012.
- Wang, Z.Y.; Han, X.Y.; Zhai, Z.C.; Wang, L.S. Study on the thermodynamic property and relative stability of a series of polychlorinated biphenyls by density functional theory. *Acta Chimica Sinica* **2005**, *63*, 964-972.
- Chana, A.; Concejero, M.A.; de Frutos, M.; González, M.J.; Herradón, B. Computational Studies on Biphenyl Derivatives. Analysis of the Conformational Mobility, Molecular Electrostatic Potential, and Dipole Moment of Chlorinated Biphenyl: Searching for the Rationalization of the Selective Toxicity of Polychlorinated Biphenyls (PCBs). *Chemical Research in Toxicology* **2002**, *15*, 1514-1526, doi:10.1021/tx025596d.
- León, L.A.; Notario, R.; Quijano, J.; Sánchez, C. Structures and Enthalpies of Formation in the Gas Phase of the Most Toxic Polychlorinated Dibenzo-p-dioxins. A DFT Study. *The Journal of Physical Chemistry A* **2002**, *106*, 6618-6627, doi:10.1021/jp025602e.
- Dorofeeva, O.V.; Vishnevskiy, Y.V.; Moiseeva, N.F. Assessment of Gaussian-3X theory for chlorinated organic molecules. Enthalpies of formation of chlorobenzenes and predictions for polychlorinated aromatic compounds. *Structural Chemistry* **2006**, *17*, 383-392, doi:10.1007/s11224-006-9047-8.
- Arulmozhiraja, S.; Fujii, T.; Tokiwa, H. Electron Affinity for the Most Toxic 2,3,7,8-Tetrachlorodibenzo-p-dioxin (TCDD): A Density Functional Theory Study. *The Journal of Physical Chemistry A* **2000**, *104*, 7068-7072, doi:10.1021/jp994237x.
- Arulmozhiraja, S.; Morita, M. Electron Affinities and Reductive Dechlorination of Toxic Polychlorinated Dibenzofurans: A Density Functional Theory Study. *The Journal of Physical Chemistry A* **2004**, *108*, 3499-3508, doi:10.1021/jp037620h.
- Thompson, D.; Ewan, B.C.R. A Group Additivity Algorithm for Polychlorinated Dibenzofurans Derived from Selected DFT Analyses. *The Journal of Physical Chemistry A* **2007**, *111*, 5043-5047, doi:10.1021/jp0709499.
- Zhai, Z.-C.; Wang, Z.-Y.; Chen, X.-H.; Wang, L.-S. DFT calculation on 204 polychlorinated biphenyls: their thermodynamic function and implication of Cl substitute position. *Journal of Molecular Structure: THEOCHEM* **2005**, *714*, 123-131, doi:10.1016/j.theochem.2004.08.060.
- Dorofeeva, O.V.; Moiseeva, N.F.; Yungman, V.S. Thermodynamic Properties of Polychlorinated Biphenyls in the Gas Phase. *The Journal of Physical Chemistry A* **2004**, *108*, 8324-8332, doi:10.1021/jp0477710.
- Dorofeeva, O.V.; Moiseeva, N.F.; Yungman, V.S.; Novikov, V.P. Ideal gas thermodynamic properties of biphenyl. *Thermochimica Acta* **2001**, *374*, 7-11, doi:10.1016/S0040-6031(01)00492-0.
- Arulmozhiraja, S.; Fujii, T.; Morita, M. Density Functional Theory Studies on Radical Ions of Selected Polychlorinated Biphenyls. *The Journal of Physical Chemistry A* **2002**, *106*, 10590-10595, doi:10.1021/jp021014p.
- Lee, J.-E.; Choi, W. DFT Calculation on the Electron Affinity of Polychlorinated Dibenzo-p-dioxins. *Bulletin of the Korean Chemical Society* **2003**, *24*, 792-796, doi:10.5012/BKCS.2003.24.6.792.
- Hou, S.; Altarawneh, M.; Kennedy, E.M.; Mackie, J.C.; Weber, R.; Dlugogorski, B.Z. Formation of polychlorinated dibenzo-p-dioxins and dibenzofurans (PCDD/F) from oxidation of 4,4'-dichlorobiphenyl (4,4'-DCB). *Proceedings of the Combustion Institute* **2019**, *37*, 1075-1082, doi:10.1016/j.proci.2018.05.045.
- Zeinali, N.; Oluwoye, I.; Altarawneh, M.; Dlugogorski, B.Z. Destruction of dioxin and furan pollutants via electrophilic attack of singlet oxygen. *Ecotoxicology and Environmental Safety* **2019**, *184*, 109605, doi:10.1016/j.ecoenv.2019.109605.
- Behjatmanesh-Ardakani, R.; Heydari, A. Molecular and dissociative adsorption of tetrachlorodibenzodioxin on M-doped graphenes (M = B, Al, N, P): pure DFT and DFT + VdW calculations. *Journal of Molecular Modeling* **2020**, *26*, 164, doi:10.1007/s00894-020-04387-4.
- Zhou, Q.; Su, X.; Yong, Y.; Ju, W.; Fu, Z.; Li, X. Adsorption of 2, 3, 7, 8-tetrachlorodibenzo-p-dioxin (TCDD) on graphene decorated with Ni and Cu: A DFT study. *Vacuum* **2018**, *149*, 53-59, doi:10.1016/j.vacuum.2017.12.016.
- Bai, N.; Wang, W.; Zhao, Y.; Feng, W.; Li, P. Theoretical Insights into the Reaction Mechanism between 2,3,7,8-Tetrachlorodibenzofuran and Hydrogen Peroxide: A DFT Study. *ACS Omega* **2019**, *4*, 358-367, doi:10.1021/acsomega.8b00724.
- Iino, F.; Tsuchiya, K.; Imagawa, T.; Gullett, B.K. An Isomer Prediction Model for PCNs, PCDD/Fs, and PCBs from Municipal Waste Incinerators. *Environmental Science & Technology* **2001**, *35*, 3175-3181, doi:10.1021/es001857z.
- Ryu, J.-Y.; Mulholland, J.A.; Dunn, J.E.; Iino, F.; Gullett, B.K. Potential Role of Chlorination Pathways in PCDD/F Formation in a Municipal Waste Incinerator. *Environmental Science & Technology* **2004**, *38*, 5112-5119, doi:10.1021/es0497227.
- Jansson, S.; Antti, H.; Marklund, S.; Tysklind, M. Multivariate Relationships between Molecular Descriptors and Isomer Distribution Patterns of PCDD/Fs Formed during MSW Combustion. *Environmental Science & Technology* **2009**, *43*, 7032-7038, doi:10.1021/es901202w.
- Jansson, S.; Grabic, R. Multivariate relationships between molecular descriptors and isomer distribution patterns of PCBs formed during household waste incineration. *Environmental Science and Pollution Research* **2014**, *21*, 3082-3090, doi:10.1007/s11356-013-2257-x.
- Larsson, M.; Kumar Mishra, B.; Tysklind, M.; Linusson, A.; Andersson, P.L. On the use of electronic descriptors for QSAR modelling of PCDDs, PCDFs and dioxin-like PCBs. *SAR and QSAR in Environmental Research* **2013**, *24*, 461-479, doi:10.1080/1062936X.2013.791719.

30. Hirano, M.; Hwang, J.-H.; Park, H.-J.; Bak, S.-M.; Iwata, H.; Kim, E.-Y. In Silico Analysis of the Interaction of Avian Aryl Hydrocarbon Receptors and Dioxins to Decipher Isoform-, Ligand-, and Species-Specific Activations. *Environmental Science & Technology* **2015**, *49*, 3795-3804, doi:10.1021/es505733f.
31. Abronin, I.A.; Volkova, L.V. On the relationship between the energy characteristics of the isodesmic reactions of polychlorinated dioxins and their toxicity. *Russian Chemical Bulletin* **2019**, *68*, 867-869, doi:10.1007/s11172-019-2498-z.
32. Larsson, M.; Fraccalvieri, D.; Andersson, C.D.; Bonati, L.; Linusson, A.; Andersson, P.L. Identification of potential aryl hydrocarbon receptor ligands by virtual screening of industrial chemicals. *Environmental Science and Pollution Research* **2018**, *25*, 2436-2449, doi:10.1007/s11356-017-0437-9.
33. Diao, J.; Li, Y.; Shi, S.; Sun, Y.; Sun, Y. QSAR Models for Predicting Toxicity of Polychlorinated Dibenzo-p-dioxins and Dibenzofurans Using Quantum Chemical Descriptors. *Bulletin of Environmental Contamination and Toxicology* **2010**, *85*, 109-115, doi:10.1007/s00128-010-0065-2.
34. Ballschmiter, K.; Buchert, H.; Niemczyk, R.; Munder, A.; Swerev, M. Automobile exhausts versus municipal-waste incineration as sources of the polychloro-dibenzodioxins (PCDD) and -furans (PCDF) found in the environment. *Chemosphere* **1986**, *15*, 901-915, doi:[https://doi.org/10.1016/0045-6535\(86\)90055-X](https://doi.org/10.1016/0045-6535(86)90055-X).
35. Ballschmiter, K.; Zell, M. Analysis of polychlorinated biphenyls (PCB) by glass capillary gas chromatography. *Fresenius Z. Anal. Chem.* **1980**, *302*, 20-31, doi:10.1007/BF00469758.
36. Agudo, A.; Aronson, K.J.; Bonefeld-Jorgensen, E.C.; Cocco, P.; Coglian, V.; Cravedi, J.-P.; Esch, H.; Fiedler, H.; Glauert, H.P.; Guo, Y.-L.L. *Polychlorinated biphenyls and polybrominated biphenyls*; 2016.
37. Ballschmiter, K.; Swerev, M. Reaction pathways for the formation of polychlorodibenzodioxins (PCDD) and -furans (PCDF) in combustion processes I. *Fresenius' Zeitschrift für analytische Chemie* **1987**, *328*, 125-127, doi:10.1007/BF00560966.
38. Dickson, L.C.; Lenoir, D.; Hutzinger, O. Quantitative comparison of de novo and precursor formation of polychlorinated dibenzo-p-dioxins under simulated municipal solid waste incinerator postcombustion conditions. *Environmental Science & Technology* **1992**, *26*, 1822-1828, doi:10.1021/es00033a017.
39. Yasuhara, A.; Ito, H.; Morita, M. Isomer-Specific Determination of polychlorinated Dibenzo-p -dioxins and Dibenzofurans in Incinerator-Related Environmental Samples. *Environmental Science & Technology* **1987**, *21*, 971-979, doi:10.1021/es50001a010.
40. Thompson, D.; Ooi, T.C.; Anderson, D.R.; Fisher, R.; Ewan, B.C.R. The polychlorinated dibenzofuran fingerprint of iron ore sinter plant: Its persistence with suppressant and alternative fuel addition. *Chemosphere* **2016**, *154*, 138-147, doi:<https://doi.org/10.1016/j.chemosphere.2016.03.066>.
41. Tiernan, T.O.; Taylor, M.L.; Garrett, J.H.; VanNess, G.F.; Solch, J.G.; Deis, D.A.; Wagel, D.J. Chlorodibenzodioxins, chlorodibenzofurans and related compounds in the effluents from combustion processes. *Chemosphere* **1983**, *12*, 595-606, doi:[https://doi.org/10.1016/0045-6535\(83\)90217-5](https://doi.org/10.1016/0045-6535(83)90217-5).
42. Ishikawa, Y.; Noma, Y.; Yamamoto, T.; Mori, Y.; Sakai, S.-i. PCB decomposition and formation in thermal treatment plant equipment. *Chemosphere* **2007**, *67*, 1383-1393, doi:<https://doi.org/10.1016/j.chemosphere.2006.10.022>.
43. Kim, K.S.; Hirai, Y.; Kato, M.; Urano, K.; Masunaga, S. Detailed PCB congener patterns in incinerator flue gas and commercial PCB formulations (Kanechlor). *Chemosphere* **2004**, *55*, 539-553, doi:<https://doi.org/10.1016/j.chemosphere.2003.11.056>.
44. Jansson, S.; Lundin, L.; Grabic, R. Characterisation and fingerprinting of PCBs in flue gas and ash from waste incineration and in technical mixtures. *Chemosphere* **2011**, *85*, 509-515, doi:<https://doi.org/10.1016/j.chemosphere.2011.08.012>.
45. Schwartz, T.R.; Campbell, R.D.; Stalling, D.L.; Little, R.L.; Petty, J.D.; Hogan, J.W.; Kaiser, E.M. Laboratory data base for isomer-specific determination of polychlorinated biphenyls. *Analytical Chemistry* **1984**, *56*, 1303-1308, doi:10.1021/ac00272a025.
46. Faroon, O.M.; Samuel Keith, L.; Smith-Simon, C.; De Rosa, C.T.; World Health Organization. *Polychlorinated biphenyls: human health aspects*; World Health Organization: 2003.
47. Sundqvist, K.L.; Tysklind, M.; Geladi, P.; Hopke, P.K.; Wiberg, K. PCDD/F Source Apportionment in the Baltic Sea Using Positive Matrix Factorization. *Environmental Science & Technology* **2010**, *44*, 1690-1697, doi:10.1021/es9030084.
48. Srogi, K. Levels and congener distributions of PCDDs, PCDFs and dioxin-like PCBs in environmental and human samples: a review. *Environmental Chemistry Letters* **2008**, *6*, 1-28, doi:10.1007/s10311-007-0105-2.
49. Hinwood, A.L.; Callan, A.C.; Heyworth, J.; Rogic, D.; de Araujo, J.; Crough, R.; Mamahit, G.; Piro, N.; Yates, A.; Stevenson, G., et al. Polychlorinated biphenyl (PCB) and dioxin concentrations in residential dust of pregnant women. *Environmental Science: Processes & Impacts* **2014**, *16*, 2758-2763, doi:10.1039/C4EM00383G.
50. Barahona-Urbina, C.; Nunez-Gonzalez, S.; Gomez-Jeria, J.S. Model-based quantum-chemical study of the uptake of some polychlorinated pollutant compounds by Zucchini subspecies. *Journal of the Chilean Chemical Society* **2012**, *57*, 1497-1503.
51. Hanari, N.; Horii, Y.; Okazawa, T.; Falandysz, J.; Bochentin, I.; Orlikowska, A.; Puzyn, T.; Wyrzykowska, B.; Yamashita, N. Dioxin-like compounds in pine needles around Tokyo Bay, Japan in 1999. *Journal of Environmental Monitoring* **2004**, *6*, 305-312, doi:10.1039/B311176H.
52. Huang, R.; Wang, P.; Zhang, J.; Chen, S.; Zhu, P.; Huo, W.; Jiang, Y.; Chen, Z.; Peng, J. The human body burden of polychlorinated dibenzo-p-dioxins/furans (PCDD/Fs) and dioxin-like polychlorinated biphenyls (DL-PCBs) in residents' human milk from Guangdong Province, China. *Toxicology Research* **2019**, *8*, 552-559, doi:10.1039/c8tx00337h.
53. Van den Berg, M.; Birnbaum, L.S.; Denison, M.; De Vito, M.; Farland, W.; Feeley, M.; Fiedler, H.; Hakansson, H.; Hanberg, A.; Haws, L., et al. The 2005 World Health Organization Reevaluation of Human and Mammalian Toxic Equivalency Factors for Dioxins and Dioxin-Like Compounds. *Toxicological Sciences* **2006**, *93*, 223-241, doi:10.1093/toxsci/kfl055.
